# Supplementary material
Source: Springer Nature journal article supplement (https://www.springermedizin.de/resource/supplementary/12891_2014_2396_MOESM1_ESM.pdf/9510106)
Supplement: MOESM1 [file 9510106]

| Cell type           | Gene           | Description                                                                                   |                                                                                                                                                                                                           |
|---------------------|----------------|-----------------------------------------------------------------------------------------------|-----------------------------------------------------------------------------------------------------------------------------------------------------------------------------------------------------------|
| Monocyte            | FPR1           | formyl peptide receptor 1 /// formyl peptide receptor 1                                       |                                                                                                                                                                                                           |
|                     | CSTA           | cystatin A (stefin A)                                                                         |                                                                                                                                                                                                           |
|                     | MNDA           | myeloid cell nuclear differentiation antigen /// myeloid cell nuclear differentiation antigen |                                                                                                                                                                                                           |
|                     | RNF130         | ring finger protein 130                                                                       |                                                                                                                                                                                                           |
|                     | S100A8         | S100 calcium binding protein A8 (calgranulin A)                                               |                                                                                                                                                                                                           |
|                     | IFI30          | interferon, gamma-inducible protein 30                                                        |                                                                                                                                                                                                           |
|                     | MEGF9          | multiple EGF-like-domains 9                                                                   |                                                                                                                                                                                                           |
|                     | LST1           | leukocyte specific transcript 1                                                               |                                                                                                                                                                                                           |
|                     | CEBPB          | CCAAT/enhancer binding protein (C/EBP), beta                                                  |                                                                                                                                                                                                           |
|                     | SLC7A7         | solute carrier family 7 (cationic amino acid transporter, y+ system), member 7                |                                                                                                                                                                                                           |
|                     | PPT1           | palmitoyl-protein thioesterase 1 (ceroid-lipofuscinosis, neuronal 1, infantile)               |                                                                                                                                                                                                           |
|                     | CRISPLD2       | cysteine-rich secretory protein LCCL domain containing 2                                      |                                                                                                                                                                                                           |
|                     | TKT            | transketolase (Wernicke-Korsakoff syndrome)                                                   |                                                                                                                                                                                                           |
|                     | FLJ22662       | hypothetical protein FLJ22662                                                                 |                                                                                                                                                                                                           |
|                     | CD1D           | CD1d molecule /// CD1d molecule                                                               |                                                                                                                                                                                                           |
|                     | LGALS1         | lectin, galactoside-binding, soluble, 1 (galectin 1)                                          |                                                                                                                                                                                                           |
|                     | CD163          | CD163 molecule                                                                                |                                                                                                                                                                                                           |
|                     | RAB31          | RAB31, member RAS oncogene family                                                             |                                                                                                                                                                                                           |
|                     | HSPA1A         | heat shock 70kDa protein 1A                                                                   |                                                                                                                                                                                                           |
|                     | LILRA2         | leukocyte immunoglobulin-like receptor, subfamily A (with TM domain), member 2                |                                                                                                                                                                                                           |
|                     | FGL2           | fibrinogen-like 2                                                                             |                                                                                                                                                                                                           |
|                     | CTSB           | cathepsin B                                                                                   |                                                                                                                                                                                                           |
|                     | SEPX1          | selenoprotein X, 1                                                                            |                                                                                                                                                                                                           |
|                     | MYD88          | myeloid differentiation primary response gene (88)                                            |                                                                                                                                                                                                           |
|                     | LMO2           | LIM domain only 2 (rhombotin-like 1)                                                          |                                                                                                                                                                                                           |
|                     | Dendritic Cell | LOC651629                                                                                     | similar to Ig kappa chain V-I region Walker precursor                                                                                                                                                     |
|                     |                | ITM2C                                                                                         | integral membrane protein 2C /// integral membrane protein 2C                                                                                                                                             |
|                     |                | IL1B                                                                                          | interleukin 1, beta                                                                                                                                                                                       |
|                     |                | ALOX5AP                                                                                       | arachidonate 5-lipoxygenase-activating protein                                                                                                                                                            |
|                     |                | IGKC                                                                                          | Immunoglobulin kappa constant                                                                                                                                                                             |
|                     |                | GAS6                                                                                          | growth arrest-specific 6                                                                                                                                                                                  |
|                     |                | CSF2RB                                                                                        | colony stimulating factor 2 receptor, beta, low-affinity (granulocyte-macrophage) /// colony stimulating factor 2 receptor, beta, low-affinity (granulocyte-macrophage)                                   |
|                     |                | TXNDC5                                                                                        | thioredoxin domain containing 5 /// thioredoxin domain containing 5                                                                                                                                       |
|                     |                | PACAP                                                                                         | proapoptotic caspase adaptor protein                                                                                                                                                                      |
|                     |                | IGKC /// IGKV1-5                                                                              | immunoglobulin kappa constant /// immunoglobulin kappa variable 1-5                                                                                                                                       |
|                     |                | HYOU1                                                                                         | hypoxia up-regulated 1                                                                                                                                                                                    |
|                     |                | IGHA1 /// IGHA2                                                                               | immunoglobulin heavy constant alpha 1 /// immunoglobulin heavy constant alpha 2 (A2m marker)                                                                                                              |
|                     |                | LEPREL1                                                                                       | leprecan-like 1                                                                                                                                                                                           |
|                     |                | HLA-DQA1 /// HLA-DQA2                                                                         | major histocompatibility complex, class II, DQ alpha 1 /// major histocompatibility complex, class II, DQ alpha 2 /// similar to HLA class II histocompatibility antigen, DQ(1) alpha chain precursor (DC |
|                     |                | /// LOC650946                                                                                 | 4 alpha chain)                                                                                                                                                                                            |
| IGH@ /// IGHG1 ///  |                | immunoglobulin heavy locus /// immunoglobulin heavy constant gamma 1 (G1m marker) ///         |                                                                                                                                                                                                           |
| IGHG2 /// IGHG3 /// |                | immunoglobulin heavy constant gamma 2 (G2m marker) /// immunoglobulin heavy constant          |                                                                                                                                                                                                           |
| IGHM /// LOC652848  |                | gamma 3 (G3m marker) /// immunoglobulin heavy constant mu /// anti-RhD monoclonal T125        |                                                                                                                                                                                                           |
| CUEDC1              |                | gamma1 heavy chain                                                                            |                                                                                                                                                                                                           |
| C20ORF103           |                | CUE domain containing 1                                                                       |                                                                                                                                                                                                           |
| TNFRSF21            |                | chromosome 20 open reading frame 103                                                          |                                                                                                                                                                                                           |
| MAN2B1              |                | tumor necrosis factor receptor superfamily, member 21                                         |                                                                                                                                                                                                           |
| BLNK                |                | mannosidase, alpha, class 2B, member 1                                                        |                                                                                                                                                                                                           |
| HLA-DRB4            |                | B-cell linker                                                                                 |                                                                                                                                                                                                           |
| IRF4                |                | major histocompatibility complex, class II, DR beta 4                                         |                                                                                                                                                                                                           |
| IGLC1               |                | interferon regulatory factor 4                                                                |                                                                                                                                                                                                           |
| HLA-DPA1            |                | immunoglobulin lambda constant 1 (Mcg marker)                                                 |                                                                                                                                                                                                           |
| LOC652745           |                | major histocompatibility complex, class II, DP alpha 1                                        |                                                                                                                                                                                                           |
|                     |                | similar to Ig kappa chain V-I region Walker precursor                                         |                                                                                                                                                                                                           |

| Cell type          | Gene                                    | Description                                                                                                                                                   |                                                                                                                                   |
|--------------------|-----------------------------------------|---------------------------------------------------------------------------------------------------------------------------------------------------------------|-----------------------------------------------------------------------------------------------------------------------------------|
| NK Cell            | MYOM2                                   | myomesin (M-protein) 2, 165kDa /// myomesin (M-protein) 2, 165kDa                                                                                             |                                                                                                                                   |
|                    |                                         | granzyme H (cathepsin G-like 2, protein h-CCPX) /// granzyme H (cathepsin G-like 2, protein h-CCPX)                                                           |                                                                                                                                   |
|                    | GZMH                                    |                                                                                                                                                               |                                                                                                                                   |
|                    | ARL4C                                   | ADP-ribosylation factor-like 4C                                                                                                                               |                                                                                                                                   |
|                    | GPLY                                    | granulysin                                                                                                                                                    |                                                                                                                                   |
|                    | HOP                                     | homeodomain-only protein /// homeodomain-only protein                                                                                                         |                                                                                                                                   |
|                    | KLRD1                                   | killer cell lectin-like receptor subfamily D, member 1                                                                                                        |                                                                                                                                   |
|                    | PRKCH                                   | protein kinase C, eta                                                                                                                                         |                                                                                                                                   |
|                    | FCGR3B                                  | Fc fragment of IgG, low affinity IIIb, receptor (CD16b)                                                                                                       |                                                                                                                                   |
|                    | FLJ20699                                | hypothetical protein FLJ20699                                                                                                                                 |                                                                                                                                   |
|                    | ID2                                     | inhibitor of DNA binding 2, dominant negative helix-loop-helix protein                                                                                        |                                                                                                                                   |
|                    | IL18RAP                                 | interleukin 18 receptor accessory protein                                                                                                                     |                                                                                                                                   |
|                    | IFITM1                                  | interferon induced transmembrane protein 1 (9-27)                                                                                                             |                                                                                                                                   |
|                    | CCL5                                    | chemokine (C-C motif) ligand 5 /// chemokine (C-C motif) ligand 5                                                                                             |                                                                                                                                   |
|                    | CD160                                   | CD160 molecule                                                                                                                                                |                                                                                                                                   |
|                    | RUNX3                                   | runt-related transcription factor 3                                                                                                                           |                                                                                                                                   |
|                    | CST7                                    | cystatin F (leukocystatin)                                                                                                                                    |                                                                                                                                   |
|                    | TGFBR3                                  | transforming growth factor, beta receptor III (betaglycan, 300kDa)                                                                                            |                                                                                                                                   |
|                    | MBP                                     | myelin basic protein                                                                                                                                          |                                                                                                                                   |
|                    | TPST2                                   | tyrosylprotein sulfotransferase 2                                                                                                                             |                                                                                                                                   |
|                    |                                         | granzyme A (granzyme 1, cytotoxic T-lymphocyte-associated serine esterase 3) /// granzyme A (granzyme 1, cytotoxic T-lymphocyte-associated serine esterase 3) |                                                                                                                                   |
|                    | GZMA                                    | family with sequence similarity 108, member A1 /// family with sequence similarity 108, member A1                                                             |                                                                                                                                   |
|                    | FAM108A1                                |                                                                                                                                                               |                                                                                                                                   |
|                    | NCAM1                                   | neural cell adhesion molecule 1                                                                                                                               |                                                                                                                                   |
|                    | STOM                                    | stomatin                                                                                                                                                      |                                                                                                                                   |
|                    | FYN                                     | FYN oncogene related to SRC, FGR, YES                                                                                                                         |                                                                                                                                   |
|                    | RGS3                                    | regulator of G-protein signalling 3                                                                                                                           |                                                                                                                                   |
|                    | CD4 T-cell                              | TRAC                                                                                                                                                          | T cell receptor alpha constant /// T cell receptor alpha constant                                                                 |
|                    |                                         | IL7R                                                                                                                                                          | interleukin 7 receptor /// interleukin 7 receptor                                                                                 |
|                    |                                         | CD3D                                                                                                                                                          | CD3d molecule, delta (CD3-TCR complex)                                                                                            |
|                    |                                         | CD6                                                                                                                                                           | CD6 molecule /// CD6 molecule                                                                                                     |
|                    |                                         | DGKA                                                                                                                                                          | diacylglycerol kinase, alpha 80kDa                                                                                                |
|                    |                                         |                                                                                                                                                               | T cell receptor alpha locus /// T cell receptor alpha locus /// T cell receptor alpha constant /// T cell receptor alpha constant |
|                    |                                         | TRA@ /// TRAC                                                                                                                                                 |                                                                                                                                   |
|                    |                                         | DDX17                                                                                                                                                         | DEAD (Asp-Glu-Ala-Asp) box polypeptide 17                                                                                         |
|                    |                                         | SATB1                                                                                                                                                         | special AT-rich sequence binding protein 1 (binds to nuclear matrix/scaffold-associating DNA's)                                   |
|                    |                                         | MGC17330                                                                                                                                                      | HGFL gene /// HGFL gene                                                                                                           |
|                    |                                         | PLSCR3                                                                                                                                                        | phospholipid scramblase 3                                                                                                         |
|                    |                                         | GOLGA8B                                                                                                                                                       | golgi autoantigen, golgin subfamily a, 8B                                                                                         |
|                    |                                         | TRBV21-1 /// TRBV19 ///                                                                                                                                       | T cell receptor beta variable 21-1 /// T cell receptor beta variable 19 /// T cell receptor beta                                  |
|                    |                                         | TRBV5-4 /// TRBV3-1 ///                                                                                                                                       | variable 5-4 /// T cell receptor beta variable 3-1 /// T cell receptor beta constant 1 /// similar to T-                          |
|                    |                                         | TRBC1 /// LOC647353                                                                                                                                           | cell receptor beta chain V region CTL-L17 precursor                                                                               |
|                    |                                         | BCL11B                                                                                                                                                        | B-cell CLL/lymphoma 11B (zinc finger protein)                                                                                     |
|                    |                                         | T cell receptor beta variable 19 /// T cell receptor beta variable 19 /// T cell receptor beta constant                                                       |                                                                                                                                   |
| TRBV19 /// TRBC1   |                                         | 1 /// T cell receptor beta constant 1                                                                                                                         |                                                                                                                                   |
| MAL                |                                         | mal, T-cell differentiation protein                                                                                                                           |                                                                                                                                   |
| LAT                |                                         | linker for activation of T cells                                                                                                                              |                                                                                                                                   |
| JARID1D            |                                         | jumonji, AT rich interactive domain 1D                                                                                                                        |                                                                                                                                   |
| TNFRSF25           |                                         | tumor necrosis factor receptor superfamily, member 25                                                                                                         |                                                                                                                                   |
| TRA@ /// TRDV2 /// |                                         | T cell receptor alpha locus /// T cell receptor delta variable 2 /// T cell receptor alpha variable 20                                                        |                                                                                                                                   |
| TRAV20 /// TRAC    |                                         | /// T cell receptor alpha constant                                                                                                                            |                                                                                                                                   |
| DNAJB1             |                                         | DnaJ (Hsp40) homolog, subfamily B, member 1                                                                                                                   |                                                                                                                                   |
| RPS4Y1             |                                         | ribosomal protein S4, Y-linked 1                                                                                                                              |                                                                                                                                   |
| IL6ST              |                                         | Interleukin 6 signal transducer (gp130, oncostatin M receptor)                                                                                                |                                                                                                                                   |
| C16ORF30           | chromosome 16 open reading frame 30     |                                                                                                                                                               |                                                                                                                                   |
| RPS3               | ribosomal protein S3                    |                                                                                                                                                               |                                                                                                                                   |
| PLA2G4B            | phospholipase A2, group IVB (cytosolic) |                                                                                                                                                               |                                                                                                                                   |

| Cell type              | Gene                | Description                                                                   |                                                                                                                                                                                                                                                                                                                     |                                                                                                                 |
|------------------------|---------------------|-------------------------------------------------------------------------------|---------------------------------------------------------------------------------------------------------------------------------------------------------------------------------------------------------------------------------------------------------------------------------------------------------------------|-----------------------------------------------------------------------------------------------------------------|
| CD8 T-cell             | GZMK                | granzyme K (granzyme 3; tryptase II) /// granzyme K (granzyme 3; tryptase II) |                                                                                                                                                                                                                                                                                                                     |                                                                                                                 |
|                        | KNS2                | Kinesin 2                                                                     |                                                                                                                                                                                                                                                                                                                     |                                                                                                                 |
|                        | SNRK                | SNF related kinase                                                            |                                                                                                                                                                                                                                                                                                                     |                                                                                                                 |
|                        | KLRK1               | killer cell lectin-like receptor subfamily K, member 1                        |                                                                                                                                                                                                                                                                                                                     |                                                                                                                 |
|                        | ATHL1               | ATH1, acid trehalase-like 1 (yeast)                                           |                                                                                                                                                                                                                                                                                                                     |                                                                                                                 |
|                        | ATM                 | ataxia telangiectasia mutated (includes complementation groups A, C and D)    |                                                                                                                                                                                                                                                                                                                     |                                                                                                                 |
|                        | CD8A                | CD8a molecule /// CD8a molecule                                               |                                                                                                                                                                                                                                                                                                                     |                                                                                                                 |
|                        | CCR7                | chemokine (C-C motif) receptor 7 /// chemokine (C-C motif) receptor 7         |                                                                                                                                                                                                                                                                                                                     |                                                                                                                 |
|                        | GOLGA8A             | golgi autoantigen, golgin subfamily a, 8A                                     |                                                                                                                                                                                                                                                                                                                     |                                                                                                                 |
|                        | ITK                 | IL2-inducible T-cell kinase                                                   |                                                                                                                                                                                                                                                                                                                     |                                                                                                                 |
|                        |                     |                                                                               | O-linked N-acetylglucosamine (GlcNAc) transferase (UDP-N-acetylglucosamine:polypeptide-N-acetylglucosaminyl transferase)                                                                                                                                                                                            |                                                                                                                 |
|                        | OGT                 |                                                                               |                                                                                                                                                                                                                                                                                                                     |                                                                                                                 |
|                        | TRGC2 /// TRGV2 /// |                                                                               |                                                                                                                                                                                                                                                                                                                     |                                                                                                                 |
|                        | TRGV9 /// TARP ///  |                                                                               | T cell receptor gamma constant 2 /// T cell receptor gamma variable 2 /// T cell receptor gamma variable 9 /// TCR gamma alternate reading frame protein /// hypothetical protein LOC642083                                                                                                                         |                                                                                                                 |
|                        | LOC642083           |                                                                               |                                                                                                                                                                                                                                                                                                                     |                                                                                                                 |
|                        | DUSP2               |                                                                               | dual specificity phosphatase 2                                                                                                                                                                                                                                                                                      |                                                                                                                 |
|                        | NELL2               |                                                                               | NEL-like 2 (chicken) /// NEL-like 2 (chicken)                                                                                                                                                                                                                                                                       |                                                                                                                 |
|                        | XIST                |                                                                               | X (inactive)-specific transcript                                                                                                                                                                                                                                                                                    |                                                                                                                 |
|                        | TRAF3IP3            |                                                                               | TRAF3 interacting protein 3                                                                                                                                                                                                                                                                                         |                                                                                                                 |
|                        | HIST1H2BG           |                                                                               | histone 1, H2bg                                                                                                                                                                                                                                                                                                     |                                                                                                                 |
|                        | GIMAP5              |                                                                               | GTPase, IMAP family member 5                                                                                                                                                                                                                                                                                        |                                                                                                                 |
|                        | KLRG1               |                                                                               | killer cell lectin-like receptor subfamily G, member 1                                                                                                                                                                                                                                                              |                                                                                                                 |
|                        | LCK                 |                                                                               | lymphocyte-specific protein tyrosine kinase                                                                                                                                                                                                                                                                         |                                                                                                                 |
|                        | LEF1                |                                                                               | lymphoid enhancer-binding factor 1                                                                                                                                                                                                                                                                                  |                                                                                                                 |
|                        | TCF7                |                                                                               | transcription factor 7 (T-cell specific, HMG-box)                                                                                                                                                                                                                                                                   |                                                                                                                 |
|                        | CD2                 |                                                                               | CD2 molecule /// CD2 molecule                                                                                                                                                                                                                                                                                       |                                                                                                                 |
|                        | SPOCK2              |                                                                               | sparc/osteonectin, cwcv and kazal-like domains proteoglycan (testican) 2                                                                                                                                                                                                                                            |                                                                                                                 |
|                        | PASK                |                                                                               | PAS domain containing serine/threonine kinase                                                                                                                                                                                                                                                                       |                                                                                                                 |
|                        | B-cell              | POU2AF1                                                                       | POU domain, class 2, associating factor 1                                                                                                                                                                                                                                                                           |                                                                                                                 |
|                        |                     | VPREB3                                                                        | pre-B lymphocyte gene 3                                                                                                                                                                                                                                                                                             |                                                                                                                 |
|                        |                     | P2RX5                                                                         | purinergic receptor P2X, ligand-gated ion channel, 5                                                                                                                                                                                                                                                                |                                                                                                                 |
|                        |                     | CD24                                                                          | CD24 molecule                                                                                                                                                                                                                                                                                                       |                                                                                                                 |
|                        |                     |                                                                               |                                                                                                                                                                                                                                                                                                                     | major histocompatibility complex, class II, DM beta /// major histocompatibility complex, class II, DM beta     |
|                        |                     | HLA-DMB                                                                       |                                                                                                                                                                                                                                                                                                                     |                                                                                                                 |
|                        |                     |                                                                               |                                                                                                                                                                                                                                                                                                                     | CD79a molecule, immunoglobulin-associated alpha /// CD79a molecule, immunoglobulin-associated alpha             |
|                        |                     | CD79A                                                                         |                                                                                                                                                                                                                                                                                                                     |                                                                                                                 |
|                        |                     | FCER2                                                                         |                                                                                                                                                                                                                                                                                                                     | Fc fragment of IgE, low affinity II, receptor for (CD23)                                                        |
|                        |                     | QRSL1                                                                         |                                                                                                                                                                                                                                                                                                                     | glutaminyl-tRNA synthase (glutamine-hydrolyzing)-like 1                                                         |
|                        |                     | CD22 /// MAG                                                                  |                                                                                                                                                                                                                                                                                                                     | CD22 molecule /// myelin associated glycoprotein                                                                |
|                        |                     |                                                                               |                                                                                                                                                                                                                                                                                                                     | major histocompatibility complex, class II, DQ beta 1 /// major histocompatibility complex, class II, DQ beta 1 |
|                        |                     | HLA-DQB1                                                                      |                                                                                                                                                                                                                                                                                                                     |                                                                                                                 |
|                        |                     | ODC1                                                                          |                                                                                                                                                                                                                                                                                                                     | ornithine decarboxylase 1                                                                                       |
|                        |                     |                                                                               |                                                                                                                                                                                                                                                                                                                     |                                                                                                                 |
|                        |                     | AKAP2 /// PALM2-AKAP2                                                         |                                                                                                                                                                                                                                                                                                                     | A kinase (PRKA) anchor protein 2 /// PALM2-AKAP2 protein                                                        |
|                        |                     | TCL1A                                                                         |                                                                                                                                                                                                                                                                                                                     | T-cell leukemia/lymphoma 1A                                                                                     |
| MS4A1                  |                     |                                                                               | membrane-spanning 4-domains, subfamily A, member 1                                                                                                                                                                                                                                                                  |                                                                                                                 |
| HLA-DRA                |                     |                                                                               | major histocompatibility complex, class II, DR alpha                                                                                                                                                                                                                                                                |                                                                                                                 |
| KIAA0746               |                     |                                                                               | KIAA0746 protein                                                                                                                                                                                                                                                                                                    |                                                                                                                 |
| SWAP70                 |                     |                                                                               | SWAP-70 protein                                                                                                                                                                                                                                                                                                     |                                                                                                                 |
| CD19                   |                     |                                                                               | CD19 molecule                                                                                                                                                                                                                                                                                                       |                                                                                                                 |
| LYN                    |                     |                                                                               | v-yes-1 Yamaguchi sarcoma viral related oncogene homolog                                                                                                                                                                                                                                                            |                                                                                                                 |
| CD37                   |                     |                                                                               | CD37 molecule                                                                                                                                                                                                                                                                                                       |                                                                                                                 |
| CD72                   |                     |                                                                               | CD72 molecule                                                                                                                                                                                                                                                                                                       |                                                                                                                 |
|                        |                     |                                                                               | major histocompatibility complex, class II, DQ beta 1 /// major histocompatibility complex, class II, DQ beta 1 /// similar to HLA class II histocompatibility antigen, DQ(W1.1) beta chain precursor (DQB1*0501) /// similar to HLA class II histocompatibility antigen, DQ(W1.1) beta chain precursor (DQB1*0501) |                                                                                                                 |
| HLA-DQB1 /// LOC650557 |                     |                                                                               |                                                                                                                                                                                                                                                                                                                     |                                                                                                                 |
| HLA-DMA                |                     |                                                                               | major histocompatibility complex, class II, DM alpha                                                                                                                                                                                                                                                                |                                                                                                                 |
| BRDG1                  |                     |                                                                               | BCR downstream signaling 1                                                                                                                                                                                                                                                                                          |                                                                                                                 |
| CHPT1                  |                     |                                                                               | choline phosphotransferase 1                                                                                                                                                                                                                                                                                        |                                                                                                                 |
